# Supplementary material for: One step solvothermal synthesis of ultra-fine N-doped TiO2 with enhanced visible light catalytic properties
Source: Royal Society of Chemistry journal article supplement (doi:10.1039/c6ra09525a), 2016-01-01
Supplement: c6ra09525a1.pdf [file c6ra09525a1.pdf]

# One step solvothermal synthesis of ultra-fine N-doped TiO<sub>2</sub> with enhanced visible light catalytic properties

S.M.Y. Mohamed Mukthar Ali and K.Y. Sandhya\*

## Supplementary Information

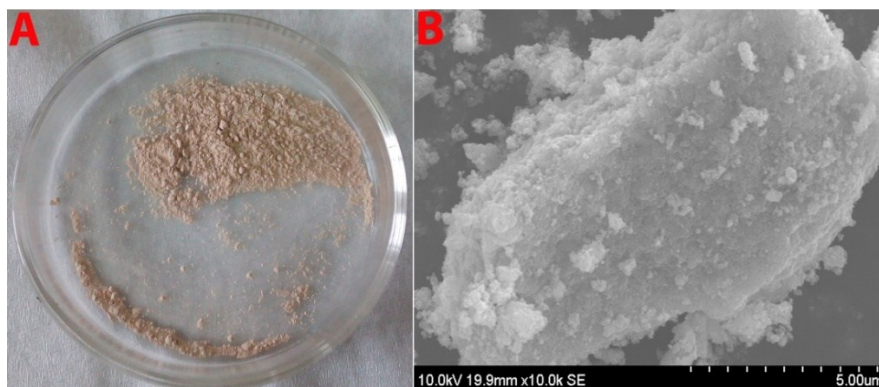

Fig. S1. (A) Photo image and its (B) SEM image of N-TiO<sub>2</sub>

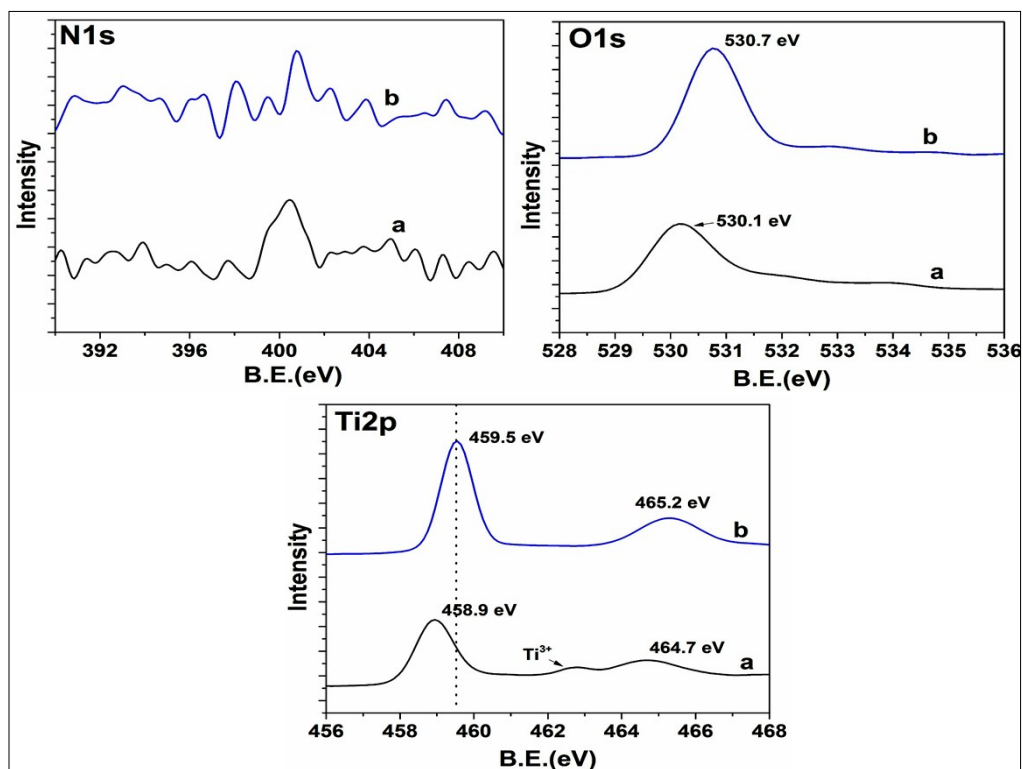

Fig. S2. XPS spectral comparison of (a): N-TiO<sub>2</sub> and (b): P25.

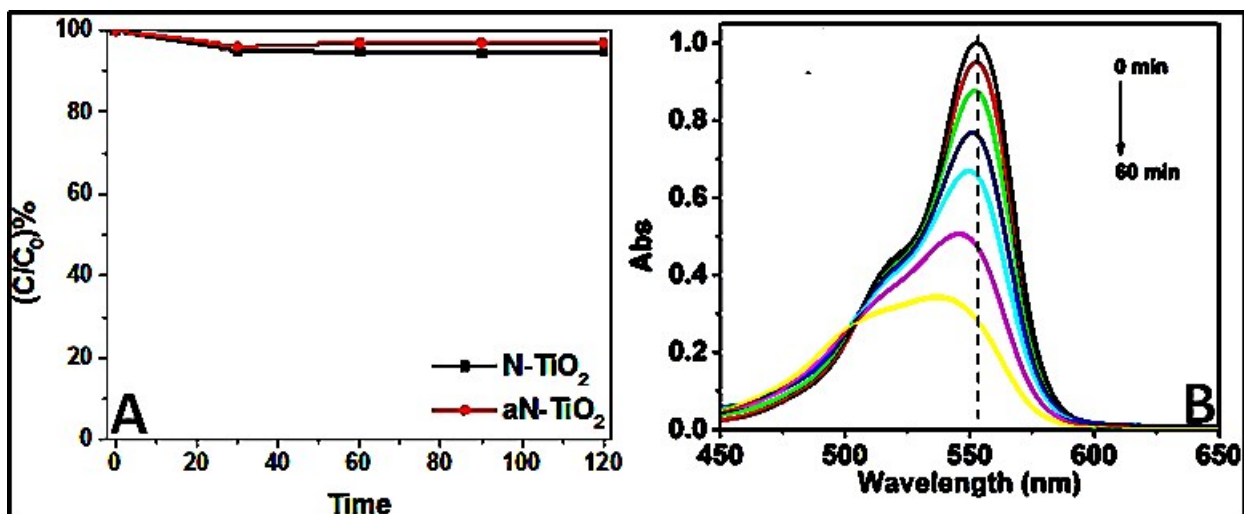

Fig. S3. (A): Adsorption of RhB for 2 hrs under dark condition and (B): Absorption spectra of RhB during visible light photodegradation monitoring by N-TiO<sub>2</sub>.

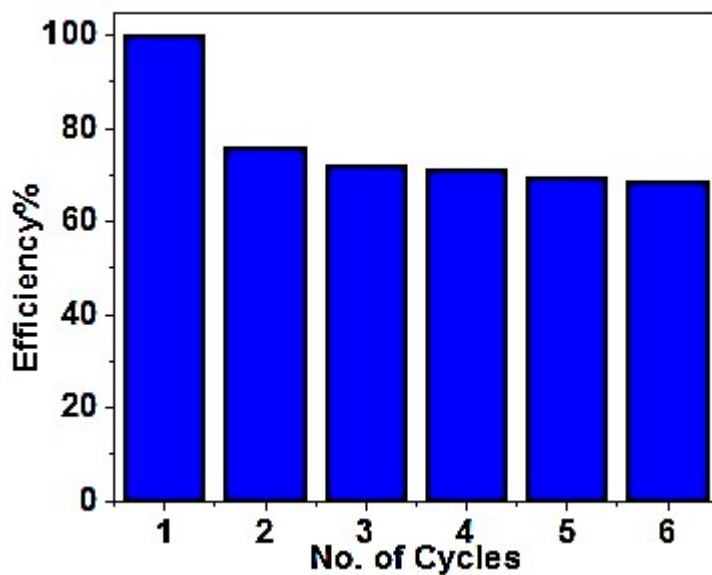

Fig. S4. Recycling studies of aN-TiO<sub>2</sub> in the photodegradation of RhB.

#### References:

1. S. A. Ansari, M. M. Khan, S. Kalathil, A. Nisar, J. Lee and M. H. Cho, *Nanoscale*, 2013, 5, 9238–9246.
